# Supplementary material for: Facile synthesis of Z-scheme Ag2CO3/Ag/AgBr ternary heterostructured nanorods with improved photostability and photoactivity
Source: Royal Society of Chemistry journal article supplement (doi:10.1039/c4ta06075j), 2015-01-01
Supplement: c4ta06075j1.pdf [file c4ta06075j1.pdf]

## Facile synthesis of Z-scheme $\text{Ag}_2\text{CO}_3/\text{Ag}/\text{AgBr}$ ternary heterostructured nanorods with improved photostability and photoactivity

Jingjing Li, Yunlong Xie, Yijun Zhong, and Yong Hu\*

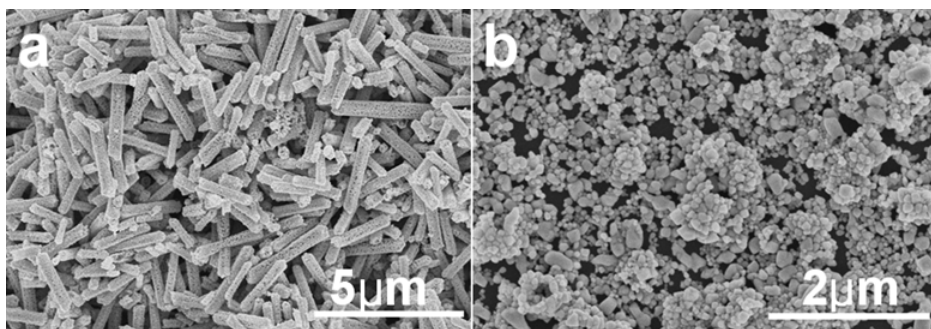

**Fig. S1** SEM images of the as-prepared 1D  $\text{Ag}_2\text{CO}_3/\text{Ag}/\text{AgBr}$  HNRs (sample H-2) and  $\text{AgBr}/\text{Ag}$  (sample H-4) synthesized with 10.96mM of CTAB.

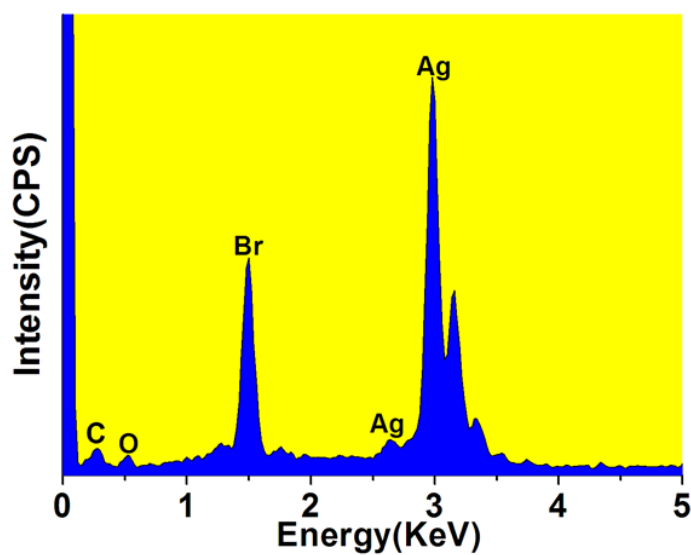

**Fig. S2** EDS spectrum of the as-prepared sample H-2.

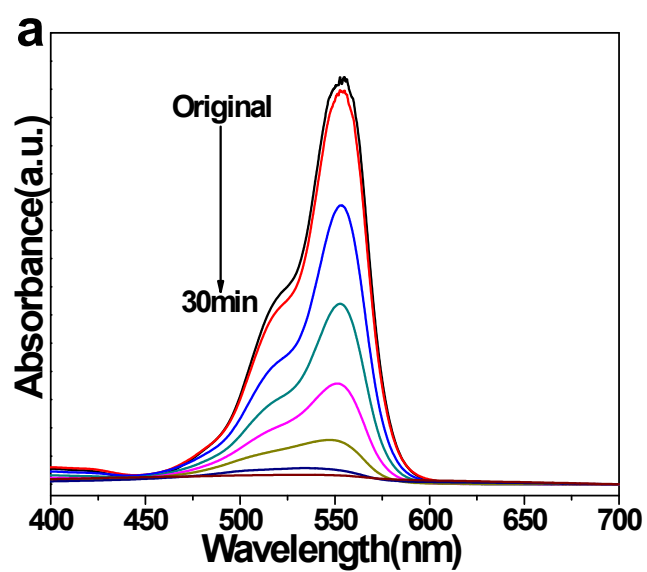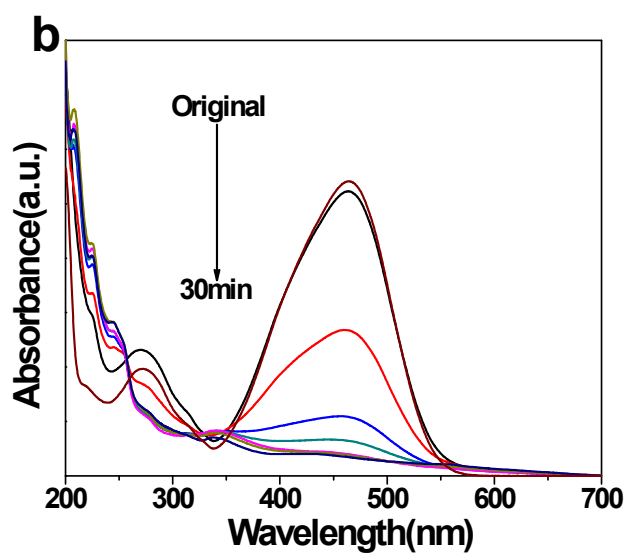

**Fig. S3** Absorption spectral changes of RhB (a) and MO (b) aqueous solutions over sample H-2 under visible light irradiation.

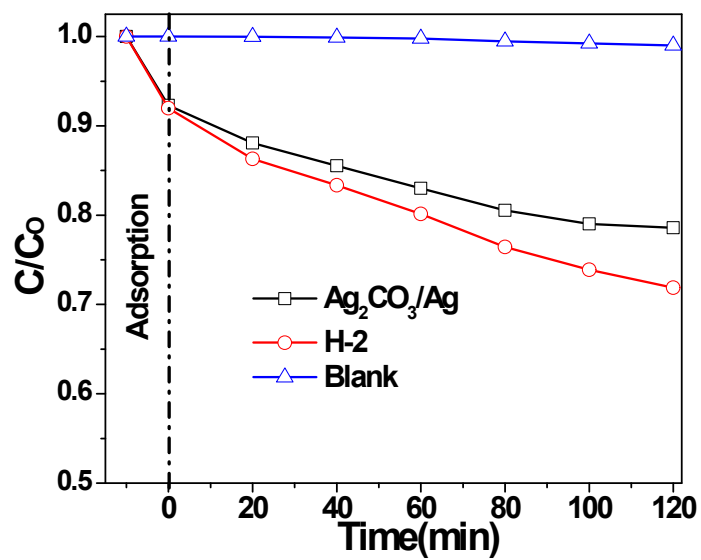

**Fig. S4** Photocatalytic degradation of benzyl alcohol using sample H-2 and Ag<sub>2</sub>CO<sub>3</sub>/Ag under visible-light illumination.

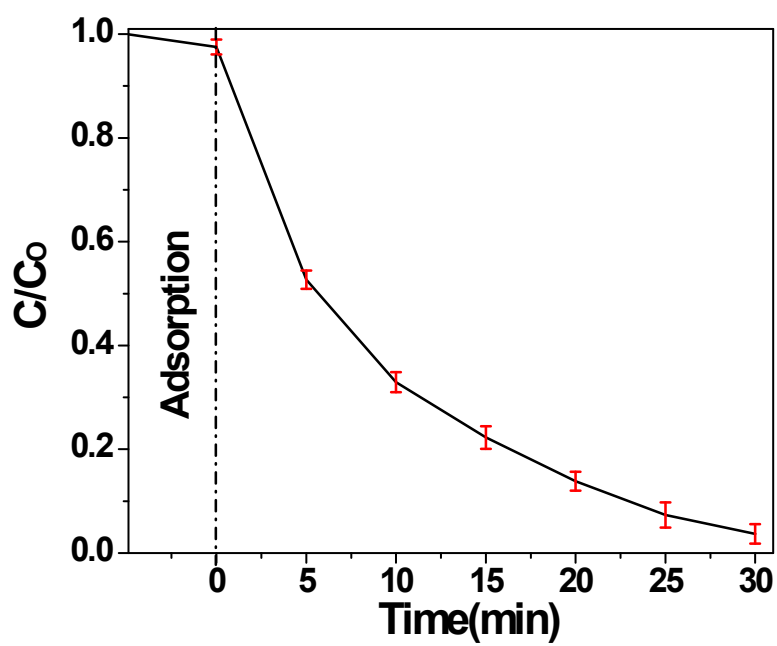

**Fig. S5** Photocatalytic degradation of RhB using sample H-2 under visible-light illumination. Error bars are the repeatability errors assuming  $\pm 2.5\%$  concentration determination error.

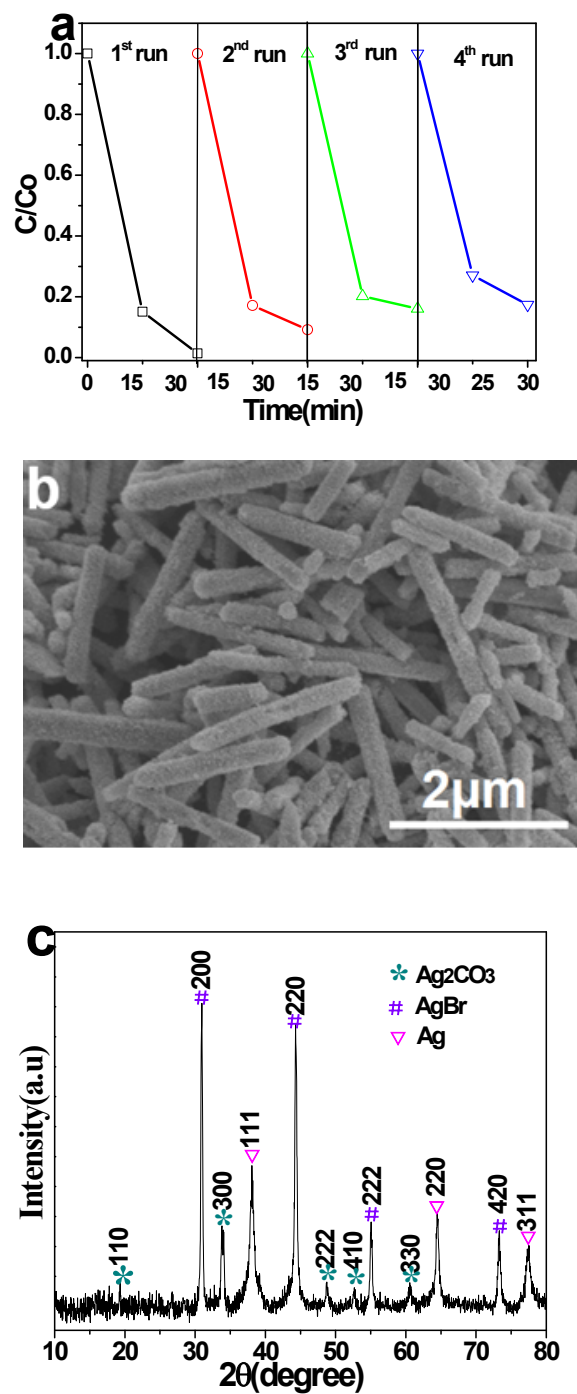

**Fig. S6** 4 cycles of the degradation of RhB using sample H-2: (a) SEM image (b) and XRD pattern (c) of sample Sc after 4 cycles of the degradation of RhB.

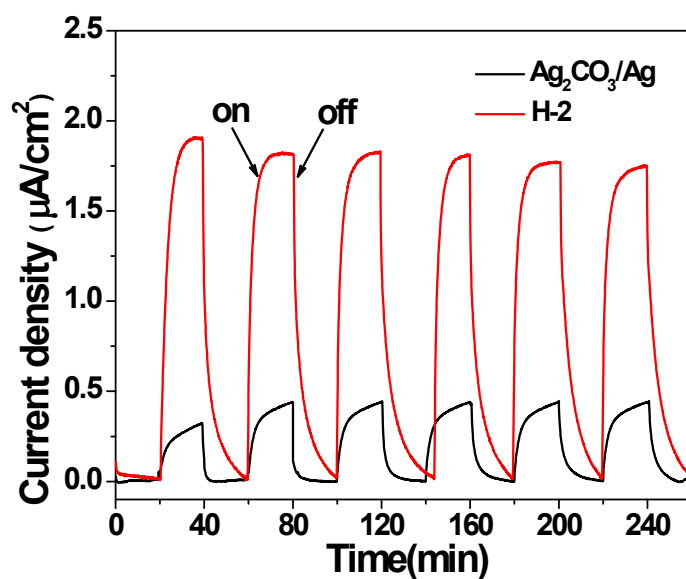

**Fig. S7** Photocurrent response of the as-prepared binary  $\text{Ag}_2\text{CO}_3/\text{Ag}$  and ternary  $\text{Ag}_2\text{CO}_3/\text{Ag}/\text{AgBr}$  HNRs (sample H-2) under visible-light illumination.

| Sample<br>H-2                  | Atomic (%) |       |       |       | Molar ratio<br>Br : Ag |
|--------------------------------|------------|-------|-------|-------|------------------------|
|                                | C          | O     | Br    | Ag    |                        |
| Before four<br>times recycling | 18.71      | 19.95 | 17.97 | 43.37 | 0.414                  |
| After four<br>times recycling  | 18.59      | 16.86 | 18.66 | 45.89 | 0.4066                 |

**Table S1.** Composition of the as-prepared sample H-2 before and after 4 times recycling.
